# Supplementary material for: A novel badnavirus discovered from Betula sp. affected by birch leaf-roll disease
Source: PubMed Central journal article supplement (PMC5833271; doi:10.1371/journal.pone.0193888), 2018-03-01
Supplement: pone.0193888.s001.pdf [file pone.0193888.s001.pdf]

S1 Table

| <b>Sample</b>    | <b>Accession number</b> | <b>Tree</b>        | <b>Location</b>             |
|------------------|-------------------------|--------------------|-----------------------------|
| MO099_LZ11       | MG686440                | M0099              | Vogelsang, Berlin           |
| MO099_LZ21       | MG686441                |                    |                             |
| MO186_AR374      | MG686442                | M0186              | Vogelsang, Berlin           |
| MO199_LZ14       | MG686443                | M0199              | Vogelsang, Berlin           |
| MO199_LZ15       | MG686444                |                    |                             |
| MO199_LZ19       | MG686445                |                    |                             |
| MO200_AR371      | MG686446                | M0200              | Vogelsang, Berlin           |
| MO200_372        | MG686447                |                    |                             |
| MO201_AR373      | MG686448                | M0201              | Vogelsang, Berlin           |
| MO202_AR369      | MG686449                | M0202              | Vogelsang, Berlin           |
| MO223_LZ6        | MG686450                | M0223              | Vogelsang, Berlin           |
| MO223_LZ25       | MG686451                |                    |                             |
| MO250_LZ27       | MG686452                | M0250              | Vogelsang, Berlin           |
| MO261_LZ4        | MG686453                | M0261              | Pücklerstraße, Berlin       |
| MO269_AR452      | MG686454                | M0269              | Vogelsang, Berlin           |
| MO276_AR368      | MG686455                | M0276              | Vogelsang, Berlin           |
| MOX_LZ12         | MG686456                | M0X                | Vogelsang, Berlin           |
| MO413_LZ24       | MG686457                | M0413              | Vogelsang, Berlin           |
| LO244_LZ5        | MG686458                | L0244              | Hochsitzweg, Berlin         |
| LOX_LZ26         | MG686459                | L0X                | Hochsitzweg, Berlin         |
| E53899_LZ9       | MG686460                | E53899             | Schwarzer Grund, Berlin     |
| E53900_LZ22      | MG686461                | E53900             | Schwarzer Grund, Berlin     |
| M1094_LZ10       | MG686462                | M1094              | Argentinische Allee, Berlin |
| M1564_LZ20       | MG686463                | M1564              | Argentinische Allee, Berlin |
| 2845_LZ18        | MG686464                | 2845               | Argentinische Allee, Berlin |
| M_LZ29           | MG686465                | M                  | Wilskistraße, Berlin        |
| 2859_LZ17        | MG686466                | 2859               | Argentinische Allee, Berlin |
| Bpub 3A(a)_AR376 | MG686422                | Bpub 3A_ Fin407501 | HU Berlin                   |

|                   |          |                   |           |
|-------------------|----------|-------------------|-----------|
| Bpub 3A(b)_AR377  | MG686423 |                   |           |
| Bpub 3I(a)_AR378  | MG686424 | Bpub 3I_Fin407507 | HU Berlin |
| Bpub 3I(b)_AR379  | MG686425 |                   |           |
| Bpen_5M_AR320     | MG686467 | Bpen_5M_Ger407526 | HU Berlin |
| Bpen_5M(a)_AR446  | MG686468 |                   |           |
| Bpub3_col2_AR477  | MG686426 | Bpub3             | Rovaniemi |
| Bpub3_col3_AR478  | MG686427 |                   |           |
| Bpub3_col4_AR479  | MG686428 |                   |           |
| Bpub19_col1_AR481 | MG686429 | Bpub19            | Rovaniemi |
| Bpub19_col2_AR482 | MG686430 |                   |           |
| Bpub19_col3_AR483 | MG686431 |                   |           |
| Bpub19_col4_AR484 | MG686432 |                   |           |
| Bpub19_col5_AR485 | MG686433 |                   |           |
| Bpub20_AR451      | MG686434 | Bpub20            | Rovaniemi |
| Bpub20_col1_AR486 | MG686435 |                   |           |
| Bpub20_col2_AR487 | MG686436 |                   |           |
| Bpub20_col3_AR488 | MG686437 |                   |           |
| Bpub20_col4_AR489 | MG686438 |                   |           |
| Bpub20_col5_AR490 | MG686439 |                   |           |
